# Supplementary material for: Enhanced Stripe Rust Resistance Obtained by Combining A Widely Dispersed, Stable QTL with Yr30 on Chromosome Arms 4BL And 3BS
Source: Research Square preprint supplement (doi:10.21203/rs.3.rs-645215/v1), 2021-07-08
Supplement: Supplementary file 1 [file b6613f4afce43d23c1b01176.xlsx]

## Sheet: Sheet1
Table S1 Allele-specific quantitative PCR (KASP) primers used to genotype RILs for enrich the genetic map of 3BS and 4BL
Marker	Chromosome	FAM	HEX	Common
AX-111197043	3B	GAAGGTGACCAAGTTCATGCTAGAATCGTCAACTGCTTGCGG	GAAGGTCGGAGTCAACGGATTAGAATCGTCAACTGCTTGCGA	TCCGGTCGTGTCGTTGGCATGTGTGTT
AX-110108039	3B	GAAGGTGACCAAGTTCATGCTGATCGGCGTCGTCGTGGC	GAAGGTCGGAGTCAACGGATTGATCGGCGTCGTCGTGGT	CCGGTCATTCTCCTCCGTTTCTTCTTGTAC
AX-109008953	3B	GAAGGTGACCAAGTTCATGCTTAGAGGGGATGAGGCATTGCCCAC	GAAGGTCGGAGTCAACGGATTTAGAGGGGATGAGGCATTGCCCAA	CACTGGTCCACTCCTCTGCTTTCA
AX-110667705	4B	GAAGGTGACCAAGTTCATGCTAGATGGAGATCCATCAAGGTCCTCT	GAAGGTCGGAGTCAACGGATTAGATGGAGATCCATCAAGGTCCTCC	CATAGCGTTTCTCTCTCTTGCC
AX-109955553	4B	GAAGGTGACCAAGTTCATGCTCACGTTTTGTTGCGGTTTCCG	GAAGGTCGGAGTCAACGGATTCACGTTTTGTTGCGGTTTCCA	ACTCCCATGTGGCTAGTCTAAGAGCG
AX-109330683	4B	GAAGGTGACCAAGTTCATGCTTCCATATGTGTCGCTGACCTTGCT	GAAGGTCGGAGTCAACGGATTTCCATATGTGTCGCTGACCTTGCC	GGTCTAGGCACTATGAGAGGCT
AX-174253230	4B	GAAGGTGACCAAGTTCATGCTgcacatagttaattgatcatgggA	GAAGGTCGGAGTCAACGGATTgcacatagttaattgatcatgggC	tgctctccggccactatagt
AX-109859663	4B	GAAGGTGACCAAGTTCATGCTGCAAATCACCATCTTGTAGCGTGGG	GAAGGTCGGAGTCAACGGATTGCAAATCACCATCTTGTAGCGTGGC	CATGGTACACACAGAAAAAATTAG
AX-94921126	4B	GAAGGTGACCAAGTTCATGCTcgttcacataaatgggctcttcG	GAAGGTCGGAGTCAACGGATTcgttcacataaatgggctcttcA	accatcctctcgagtgccA
AX-89610727	4B	GAAGGTGACCAAGTTCATGCTcggaagctaagtctcagaagagtA	GAAGGTCGGAGTCAACGGATTcggaagctaagtctcagaagagtC	aggggacgactcactcttcg
AX-111121224	4B	GAAGGTGACCAAGTTCATGCTcgccatattttgctactactcgC	GAAGGTCGGAGTCAACGGATTcgccatattttgctactactcgT	cacagctctgccgtgataga
AX-89518393	4B	GAAGGTGACCAAGTTCATGCTctttttgatttgagtcgatccacC	GAAGGTCGGAGTCAACGGATTctttttgatttgagtcgatccacT	accactctctttccaagacct
AX-109457891	4B	GAAGGTGACCAAGTTCATGCTgtcgttacttggcgcagttaC	GAAGGTCGGAGTCAACGGATTgtcgttacttggcgcagttaT	cactaacagatggcccagca
AX-109344792	4B	GAAGGTGACCAAGTTCATGCTcattattgtggaaggatggatagaG	GAAGGTCGGAGTCAACGGATTcattattgtggaaggatggatagaT	catgatctccgctagcgcc
