# Supplementary material for: Enhanced Stripe Rust Resistance Obtained by Combining A Widely Dispersed, Stable QTL with Yr30 on Chromosome Arms 4BL And 3BS
Source: Research Square preprint supplement (doi:10.21203/rs.3.rs-645215/v1), 2021-07-08
Supplement: Supplementary file 2 [file daa647137557d0248350f4b8.xlsx]

## Sheet: Sheet1
Table S3 Information of physical map and intergrated map
Cluster	QTL	Loci	Wheat variety	Chromosome	Map population	Marker 1	Marker 2	Physical position (bp)		Genetic position (cM)		Reference
								start	end	start	end
Ⅰ（475.8-637.5Mb）	QYrpa.ufs	QYr.ufs-4B_Palmiet	Palmiet	4BL	NIL	Xgwm495	Xgwm165	482820630	509036052	163.8	161	Agenbag et al. (2012)	Identification of adult plant resistance to stripe rust in the cultivar Cappelle-Desprez
	QYrrrb.ui	QYrrb.ui-4B	Rio Blanco	4BL	NIL	Xgwm495	Xgwm165	482820630	509036052	163.8	161	Chen et al.(2012)	Genome-wide identification of QTL conferring high-temperature adult-plant (HTAP) resistance to stripe rust (Puccinia striiformis f. sp. tritici) in wheat
	QYrja.sun	QYr.sun-4B_Janz	Janz	4BC	NIL	Xgwm368	XwPt-8543	236743112	629226998	161.4	162.2	Zwart et al.(2010)	QTL mapping of multiple foliar disease and root-lesion nematode resistances in wheat
	Qyravs-4B	QYr.4BL-AvS	Avocet S	4BL	NIL	Xgwm495	Xgwm149	482820630	544649887	163.8	165.2	William et al. (2006)	Characterization of genetic loci conferring adult plant resistance to leaf rust and stripe rust in spring wheat
	QYrli.caas	QYr.caas-4BL_Libellula	Libellula	4BL	NIL	Xgwm165	Xgwm149	509036052	544649887	161	165.2	Lu et al.(2009)	QTL mapping for adult-plant resistance to stripe rust in Italian common wheat cultivars Libellula and Strampelli
	QPst.jic-4B	QPst.jic-4B	Alcedo	4B	NIL	Xstm535	Xwmc692	/	592621381	161.6	167.5	Jagger et al.(2011)	The genetic characterisation of stripe rust resistance in the German wheat cultivar Alcedo
	QYr.wpg	QYr.wpg-4B.1_IWA4348	GWAS	4B	NIL	XIWA4348		531050164	/	160.8	/	Naruoka et al. (2015)	Genome-wide association mapping for stripe rust (Puccinia striiformis f. sp. tritici) in US Pacific Northwest winter wheat (Triticum aestivum L.)
	QYrPI181410.wgp	QYrPI181410.wgp-4BL	PI181410	4BL	NIL	IWB6961	IWB70599	475806782	480922693	165.3	165.1	Liu et al. (2020)	Genome-Wide Mapping of Quantitative Trait Loci Conferring All-Stage and High-Temperature Adult-Plant Resistance to Stripe Rust in Spring Wheat Landrace PI 181410
	QYr.crc-4BL	QYr.crc-4BL	Toropi	4BL	NIL	IWB8517	IWB62918	601931250	616999284	164.4	165.4	Rosa et al. (2019)	Genetic Characterization of Leaf and Stripe Rust Resistance in the Brazilian Wheat Cultivar Toropi
	Yr68	Yr68	AGG91587WHEA	4BL	NIL	XIWA4640	XIWB74301	/	/	163.6	163.6	Chen and Kang et al. (2017)	Stripe Rust[M]. Springer Netherlands, 2017.
	QYr.uaf-4B.3	QYr.uaf-4B.3	GWAS	4BL	GWAS	IWB12434		603144765	/	164.4	/	Habib et al. (2020)	Genome-Wide Association Mapping for Stripe Rust Resistance in Pakistani Spring Wheat Genotypes
	YrZH22	YrZH22	Zhoumai22	4BL	GWAS	WGGB133	WGGB146	580789060	672106120	/	/	Wang et al. (2017)	Mapping stripe rust resistance gene YrZH22 in Chinese wheat cultivar Zhoumai 22 by bulked segregant RNA‑Seq (BSR‑Seq) and comparative genomics analyses
	Yr62	Yr62	PI 192252, PI 660060	4BL	NIL	Xgwm192	Xgwm251	/	/	174.9	174.9	Lu et al. (2014)	Mapping of Yr62 and a small‑effect QTL for high‑temperature adult‑plant resistance to stripe rust in spring wheat PI 192252
	Yr50	Yr50	Thinopyrum intermedium（CH223, TAI7047 ）	4BL	NIL	Xbarc1096	Xwmc47	/	/	167.5	188.6	Liu et al. (2013)	Putative Thinopyrum intermedium-derived stripe rust resistance gene Yr50 maps on wheat chromosome arm 4BL
	QYrFDC12	Qyr.nwafu-4BL.2	Fengdecun12	4BL	NIL	AX-111121224	AX-89518393	621961087	634336318	169.1	172.9	This study
	QYrva.vt	QYrva.vt-4BL_VA00W-38	VA00W-38	4BL	NIL	Xwmc692	Xbarc163	592621381	608252466	167.5	171.8	Christopher et al. (2013)	Identification and mapping of adult plant stripe rust resistance in soft red winter wheat VA00W-38
	QYrgu.jic	QYr.jic-4B_Guardian	Guardian	4B	NIL	Xwmc692	Xwmc652	592621381	622225609	167.5	174.7	Melichar et al. (2008)	QTL identification and micropheno_x0002_type characterisation of the developmentally regulated yellow rust resistance in the UK wheat
	QYrpl.orr	QYrpl.orr-4BL	Platte	4BL	NIL	312980		/	/	177.5	/	Vazquez et al. (2012)	Genetic analysis of adult plant,quantitative resistance to stripe rust in wheat cultivar ‘Stephens’ in multi_x0002_environment trials
	QYrsk.wgp	QYrsk.wgp-4BL	Skiles	4BL	NIL	IWB1249	IWB35006	475806782	664527050	165.3	175.6	Liu et al. (2019)	QTL analysis of durable stripe rust resistance in the North American winter wheat cultivar Skiles
	QYr.humai15-4BL	QYr.humai15-4BL	Humai15	4BL	NIL	AX-111150955	AX-110089756	523448565	/	160.5	174.9	Yuan et al. (2018)	QTL Mapping and Validation of Adult Plant Resistance to Stripe Rust in Chinese Wheat Landrace Humai 15
	QYrEDWL.par-4BL.2	QYrEDWL.par-4BL.2	GWAS	4BL	GWAS	IWB74594		634459539	/	176.5	/	Liu et al. (2017)	Novel Sources of Stripe Rust Resistance Identified by Genome-Wide Association Mapping in Ethiopian Durum Wheat ( Triticum turgidum ssp. durum)
Ⅱ（652.0-667.5Mb）	QYr.wpg-4B.2	QYr.wpg-4B.2_IWA3994	GWAS	4B	GWAS	IWA6397	IWA2031	651986581	652775561	207.2	208.7	Naruoka et al. (2015)	Genome-wide association mapping for stripe rust (Puccinia striiformis f. sp. tritici) in US Pacific Northwest winter wheat (Triticum aestivum L.)
	QYr.cim-4BL	QYr.cim-4BL	Arableu#1	4BL	NIL	1235862	1220607	657992955	663816564	/	/	Yuan et al. (2019)	Genome-Wide Mapping of Adult Plant Resistance to Leaf Rust and Stripe Rust in CIMMYT Wheat Line Arableu#1
	QYrww.wgp.4B	QYrww.wgp.4B	GWAS	4BL	GWAS	IWA2869		666050026	/	219	/	Mu et al. (2020)	Genome-Wide Association Study and Gene Specific Markers Identified 51 Genes or QTL for Resistance to Stripe Rust in U.S. Winter Wheat Cultivars and Breeding Lines
	QYr.uaf-4B.1	QYr.uaf-4B.1	GWAS	4BL	GWAS	IWA408		663857379	/	219	/	Habib et al. (2020)	Genome-Wide Association Mapping for Stripe Rust Resistance in Pakistani Spring Wheat Genotypes
	QYr.uaf-4B.2	QYr.uaf-4B.2	GWAS	4BL	GWAS	IWA2031		650892094	/	208.7	/	Habib et al. (2020)	Genome-Wide Association Mapping for Stripe Rust Resistance in Pakistani Spring Wheat Genotypes
	QYr.sicau-4B.2	QDS.sicau-4B.2	GWAS	4BL	GWAS	1218468		667549073	/		/	Li et al. (2019)	Genome-Wide Association Study for Adult-Plant Resistance to Stripe Rust in Chinese Wheat Landraces ( Triticum aestivum L.) From the Yellow and Huai River Valleys
	YrEDWL-4BL	YrEDWL-4BL	GWAS	4BL	GWAS	IWB35335		658196565	/	214.5	/	Liu et al. (2017)	Novel Sources of Stripe Rust Resistance Identified by Genome-Wide Association Mapping in Ethiopian Durum Wheat ( Triticum turgidum ssp. durum)
Other	Qyrol-4b	QYr-4B_Oligoculm	Oligoculm	4BL	NIL	Xgwm538		641482328	663806379	187.2	/	Suenaga et al. (2003)	Microsatellite markers for genes Lr34/Yr18 and other quantitative trait loci for leaf rust and stripe rust resistance in bread wheat
	QYr.nwafu-4BL	Qyr.nwafu-4BL	P10103	4BL	NIL	AX-110963704	AX-111022510	645074230	649575719	189.7	193.2	Wu et al. (2018)	Comparative genome-wide mapping versus extreme pool-genotyping and development of diagnostic SNP markers linked to QTL for adult plant resistance to stripe rust in common wheat
